## Photoperiodic and Diurnal Regulation of WNT Signaling in the Arcuate Nucleus of the Female Djungarian Hamster, *Phodopus sungorus*

Alisa Boucsein, Jonas Benzler, Cindy Hempp, Sigrid Stöhr, Gisela Helfer, and Alexander Tups

Department of Physiology (A.B., A.T.), Centre for Neuroendocrinology and Brain Health Research Centre, University of Otago, Dunedin 9054, New Zealand; Department of Animal Physiology (A.B., J.B., C.H., S.S., A.T.), Faculty of Biology, Philipps University of Marburg, D-35032 Marburg, Germany; and Rowett Institute of Nutrition and Health (G.H.), University of Aberdeen, Aberdeen AB21 9SB, Scotland, United Kingdom

The WNT pathway was shown to play an important role in the adult central nervous system. We previously identified the WNT pathway as a novel integration site of the adipokine leptin in mediating its neuroendocrine control of metabolism in obese mice. Here we investigated the implication of WNT signaling in seasonal body weight regulation exhibited by the Djungarian hamster (*Phodopus sungorus*), a seasonal mammal that exhibits profound annual changes in leptin sensitivity. We furthermore investigated whether crucial components of the WNT pathway are regulated in a diurnal manner. Gene expression of key components of the WNT pathway in the hypothalamus of hamsters acclimated to either long day (LD) or short day (SD) photoperiod was analyzed by in situ hybridization. We detected elevated expression of the genes *WNT-4*, *Axin-2*, *Cyclin-D1*, and *SFRP-2*, in the hypothalamic arcuate nucleus, a key energy balance integration site, during LD compared with SD as well as a diurnal regulation of *Axin-2*, *Cyclin-D1*, and *DKK-3*. Investigating the effect of photoperiod as well as leptin on the activation (phosphorylation) of the WNT coreceptor LRP-6 (Ser1490) by immunohistochemistry, we found elevated activity in the arcuate nucleus during LD relative to SD as well as after leptin treatment (2 mg/kg body weight). These findings indicate that differential WNT signaling may be associated with seasonal body weight regulation and is partially regulated in a diurnal manner in the adult brain. Furthermore, they suggest that this pathway plays a key role in the neuroendocrine regulation of body weight and integration of the leptin signal. (*Endocrinology* 157: 799–809, 2016)

**S**urvival in a seasonally changing environment requires physiological adaptations for most animals. In seasonal mammals, these adaptations are driven by photoperiod and exhibit remarkable changes in growth, energy balance and reproduction, resulting from changes in the neuroendocrine axis.

During the last decade, significant progress has been achieved in unraveling the molecular mechanisms underlying these physiological changes. One of the best-characterized seasonal rodent models is the Djungarian hamster (*Phodopus sungorus*), also known as the Siberian

hamster, because these mammals show an extensive body weight reduction of about 40% in winter-like conditions (short days [SD]) compared with summer-like conditions (long days [LD]). More than half of this weight loss derives from a reduction of adipose tissue mass (1). This annual body weight cycle is characterized by seasonally regulated leptin sensitivity (1).

Accumulating evidence suggests that the WNT signaling pathway, which has been well characterized in embryogenesis and tumorigenesis (2, 3), can be altered in diverse tissues by the body weight-regulating hormone

ISSN Print 0013-7227 ISSN Online 1945-7170  
Printed in USA

Copyright © 2016 by the Endocrine Society

Received August 10, 2015. Accepted November 25, 2015.

First Published Online December 8, 2015

Abbreviations: ARC, arcuate nucleus; DG, dentate gyrus; DKK, Dickkopf; Fz, Frizzled; GSK-3 $\beta$ , glycogen synthase kinase-3 $\beta$ ; HI, hippocampus; LD, long days; LRP, low-density lipoprotein receptor-related protein; SD, short days; SFRP, secreted Fz-related protein; STAT3, signal transducer and activator of transcription 3; WNT, WNT ligand; ZT, Zeitgeber time.

leptin (4, 5). Additionally, hypothalamic WNT signaling was shown to be implicated in the control of adipogenesis and adult neurogenesis as well as the cellular and structural remodeling of the adult hypothalamus (6–8). Recent findings from our laboratory suggested that the central WNT pathway is crucial for the neuroendocrine control of metabolism in mice (5, 9). Furthermore, several genes involved in WNT signal transduction were shown to be regulated by photoperiod in photoperiod-responsive F344 rats (8, 10, 11).

The canonical,  $\beta$ -catenin-dependent WNT pathway is activated when extracellular WNT ligands bind to Frizzled (Fz) receptors and associated coreceptors, the low-density lipoprotein receptor-related proteins (LRPs). The coreceptor LRP-6 is activated via phosphorylation at Ser1490 (12). Subsequently, the formation of a protein complex including Axin-1, Dishevelled, and adenomatous polyposis coli is prevented, resulting in an inhibition of the key enzyme glycogen synthase kinase-3 $\beta$  (GSK-3 $\beta$ ). This leads to the stabilization of the cotranscription factor  $\beta$ -catenin in the cytoplasm and its translocation to the nucleus, in which it promotes binding of the transcription factor T cell-specific transcription factor 7, which then induces the expression of WNT target genes (13). In the absence of WNT ligands (WNTs) or in the presence of WNT antagonists such as Dickkopf (DKK) proteins or secreted Fz-related proteins (SFRPs), GSK-3 $\beta$  lingers in the complex and phosphorylates  $\beta$ -catenin, inducing its proteasomal degradation (13).

Circadian clocks adjust behavioral and physiological processes to the most beneficial time of day in a broad range of species. In mammals, the primary entrainment signal (Zeitgeber) is light, which synchronizes the circadian clock, whose pacemaker resides in the hypothalamic suprachiasmatic nucleus with environmental cues (14). The circadian clock is tightly coupled to metabolism and feeding rhythms (15, 16), and GSK-3 $\beta$  has been described as being a crucial part of the transcriptional-translational feedback loop that comprises the clock because this kinase is responsible for the phosphorylation of key clock components and might thereby directly affect circadian rhythms (17–21). Furthermore, the prominent WNT target gene *Cyclin-D1* was shown to be under the control of the circadian clock in the periphery (22). Most of our knowledge about the circadian regulation of WNT signaling derives from stem cell proliferation and cancer studies. However, whether WNT signaling molecules are regulated in a diurnal manner in the hypothalamus is unknown.

In the current study, we analyzed whether WNT signaling is active in the hypothalamus of adult Djungarian hamsters and is furthermore regulated by photoperiod or

in a diurnal manner, potentially implicating a novel regulatory role in the hamsters' profound seasonal alterations in physiology. We therefore examined seasonal as well as diurnal regulation of the WNT pathway by analyzing whether key molecules of the WNT pathway are differentially regulated, on a transcriptional and posttranslational level, between hamsters held in LD and SD at different times throughout the day. Furthermore, we challenged hamsters with leptin administration to corroborate our recent finding that leptin activates the WNT pathway in a different rodent species (5).

## Materials and Methods

### Animals

All procedures involving animals were performed in accordance with German animal ethics legislation and received approval by the respective authorities for animal ethics. Female Djungarian hamsters (*P. sungorus*) were bred under LD conditions (light/dark cycle: 16 h light, 8 h dark) at the Department of Biology of the University of Marburg (Marburg, Germany). At the age of 3 weeks, hamsters were weaned and housed individually at an ambient temperature of 21°C with ad libitum access to standard chow diet and water. Hamsters were maintained in LD or, where specified, transferred to SD conditions (light/dark cycle: 8 h light, 16 h dark) for a further 8 weeks until they were fully adapted to SD. Body weight was recorded weekly during this time. Before the animals were killed, they were food deprived for 16 hours. For in situ hybridization, animals were euthanized by cervical dislocation and brains were rapidly frozen on dry ice. For immunohistochemistry, transcardial perfusion was performed and brains were treated as described elsewhere (23). To characterize the diurnal expression profiles of key WNT genes, adult Djungarian hamsters were used. After weaning, all hamsters were maintained in LD until adulthood (3–5 mo of age), whereupon they either remained in LD or were transferred to SD for a further 8 weeks. During LD, the light period was from Zeitgeber time (ZT) 0 to ZT16 and during SD from ZT0 to ZT8. Hamsters were killed at ZT0, ZT3, ZT6, ZT9, ZT12, ZT15, ZT18, and ZT21 ( $n = 4$ –5 animals per photoperiod and time point). Hamsters killed during the dark phase were euthanized under dim red light.

### Detection of hypothalamic gene expression by in situ hybridization

In situ hybridization was performed on brains of Djungarian hamsters aged 5–7 months. Coronal brain sections (16  $\mu$ m) were collected throughout the extent of the arcuate nucleus (ARC) onto a set of 12 slides with 10 sections mounted on each slide, as described previously (24). The slides spanned the hypothalamic region approximately from  $-2.7$  to  $-0.8$  mm relative to Bregma according to the atlas of the mouse brain (25). Riboprobes specific for *WNT-4*, *GSK-3 $\beta$* , *Axin-2*, *Cyclin-D1*, and *DKK-3* mRNA were prepared as described elsewhere (5). Riboprobes specific for *SFRP-2* mRNA were prepared from a 157-bp DNA template, which was generated from *P. sungorus* hypothalamic cDNA by PCR using forward primer 5'-GCC ACG GCA TCG

AGT ACC AGA ACA-3' and reverse primer 5'-ACA GGG GCG AAG AGC GAG CAC A-3'. Primers used for the amplification of DNA fragments were designed using the Lasergene Primer Select software (DNASTAR, Inc). Amplified DNA fragments were ligated into pGEM-T Easy Vector (Promega Corp), transformed into DH5- $\alpha$  *Escherichia coli*, and sequenced. In situ hybridization and analysis were performed as described previously (24). Briefly, cRNA synthesis was facilitated using SP6-polymerase or T7-polymerase as part of a riboprobe synthesis kit (Promega). Slides were fixed, acetylated, and dehydrated, followed by overnight hybridization at 58°C using [<sup>35</sup>S]-labeled cRNA probes (1–2 × 10<sup>7</sup> cpm/mL). Subsequently, slides were treated with ribonuclease A, desalted, and dehydrated. For autoradiography, dried slides were exposed to Amersham Hyperfilm MP (GE Healthcare) together with Amersham [<sup>14</sup>C]-microscale standard. Images were quantified by measurement of OD in a defined area (ARC) using the Image-Pro Plus software (Media Cybernetics), and data were stated as integrated OD.

### Immunohistochemistry

To investigate whether leptin regulates the hypothalamic WNT pathway in a photoperiod-dependent manner, the phosphorylation of the Fz coreceptor LRP-6, as the marker of its activation, was analyzed. Therefore, Djungarian hamsters were maintained in LD or transferred to SD immediately after weaning. Hamsters received a single ip injection of either leptin (2 mg/kg body weight) or vehicle (0.9% saline) 15 minutes prior to transcardial perfusion (n = 6–8 animals per each group). Subsequently, immunohistochemistry was performed. Free-floating brain sections were pretreated with 10% methanol, 1% NaOH, and 1% H<sub>2</sub>O<sub>2</sub> in H<sub>2</sub>O for 20 minutes, 0.3% glycine for 10 minutes, and 0.03% sodium dodecyl sulfate for 10 minutes. Next, sections were blocked with 1% normal goat serum and 5% BSA in sodium phosphate buffer-Triton X-100 (0.5%) for 1 hour, followed by overnight incubation at 4°C using a rabbit antiphospho-LRP-6 (Ser1490) antibody (1:1500 in blocking solution; catalog number 2568; Cell Signaling Technology, Inc). On the next day, sections were rinsed and incubated with biotinylated goat-antirabbit secondary antibody (1:1000 in blocking solution) for 1 hour, followed by avidin biotin complex solution (Vector Laboratories, Inc) for 1 hour. Finally, the signal was developed by diaminobenzidine solution (Vector Laboratories), giving a gray precipitate. Pictures were taken and immunoreactive cells were counted by two investigators blinded to the treatments.

### Statistical analysis

Rhythmicity of each gene expression was analyzed using one-way factorial ANOVA with Tukey's honestly significant difference post hoc test. To compare phasing and peak expression times, a polynomial fourth-order nonlinear regression was fitted with GraphPad Prism software (GraphPad Software). The effect of day length on each gene's expression profile was then examined by pairwise comparison. Where polynomial fourth-order nonlinear regression indicated rhythmicity of a gene, the difference at each time point was analyzed by a Student's *t* test. For nonrhythmically expressed genes, the values at the different time points were averaged and the mean expression over 24 hours was compared by a Student's *t* test. Coreceptor modification was analyzed by a two-way ANOVA followed by a Holm-Sidak com-

parison test, as appropriate, using SigmaStat statistical software (Systat Software; Jandel). Results are presented as mean ± SEM, and differences were considered significant if *P* ≤ .05.

## Results

### Localization of WNT signaling gene expression in the brain of Djungarian hamsters

To explore whether WNT signaling is active in the hypothalamus of adult Djungarian hamsters, we analyzed the expression patterns of genes encoding components of the WNT pathway. By performing in situ hybridization, we found that all investigated genes were expressed in the mediobasal hypothalamus, especially in the ARC. Additionally, expression of all genes occurred in extrahypothalamic regions such as the cortex, the thalamus, and the dentate gyrus (DG) as well as the CA1, CA2, and CA3 fields of the hippocampus (HI). The riboprobe specific for *WNT-4* hybridized also to the choroid plexus. Expression of *GSK-3β* and *Axin-2* was relatively intense in the DG and HI and also occurred in the medial habenula and the ventromedial hypothalamus. Both *Cyclin-D1* and *DKK-3* mRNAs were mainly expressed in the ARC, HI, and DG, *DKK-3* additionally in the medial habenula. *SFRP-2* mRNA was intensely concentrated in the thalamus and showed a weaker signal in the ventromedial hypothalamus (Figure 1). Hybridization signals did not occur using the respective sense riboprobes (Figure 1, *DKK-3* sense riboprobe is shown as an example).

### Temporal expression pattern of WNT signaling genes in the hypothalamus under long and short photoperiod

Temporal expression patterns of WNT signaling genes in the hypothalamus were examined in the LD or SD photoperiod. Nonlinear regression analysis revealed a trend for diurnal rhythmicity of *Axin-2* expression (Figure 2A; *P* = .098) as well as different amplitude and peak expression times of *Cyclin-D1* and *DKK-3* (Figure 2, B and C), exposing diurnal rhythmicity of both genes. In contrast, no evidence for the rhythmic expression of *WNT-4*, *GSK-3β*, and *SFRP-2* (Figure 3) over 24 hours was obtained. *Axin-2* gene expression showed similar expression patterns between the two photoperiods. The differential expression of mRNA levels appeared to increase during the dark phase and seemed to decline during the light phase. For both LD and SD, *Axin-2* showed the lowest expression levels around the first half of the subjective night (ZT11 and ZT12, respectively).

*Cyclin-D1* gene expression during LD showed a trend (*P* = .098) toward and during SD a significant diurnal

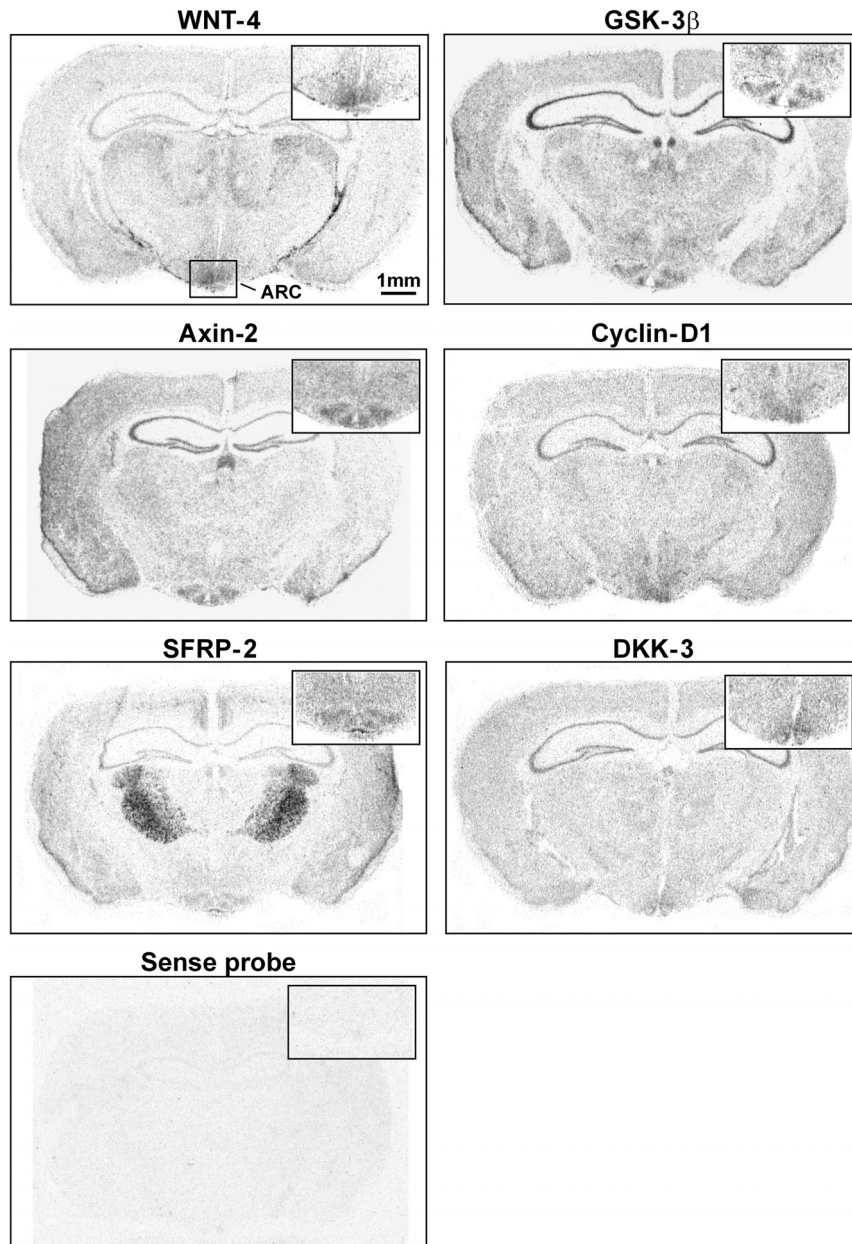

**Figure 1.** Genes encoding members of the WNT pathway are expressed in the brain of Djungarian hamsters. Genes encoding for the WNT ligand *WNT-4*, the key enzyme *GSK-3 $\beta$* , the WNT target genes *Axin-2* and *Cyclin-D1* and the antagonists *SFRP-2* and *DKK-3* were detected by in situ hybridization with antisense [ $^{35}$ S]-labeled riboprobes. All investigated genes were expressed in the ARC of the hypothalamus. Additionally, some expression occurred in the cortex, hippocampus, and thalamus. Representative for all respective sense riboprobes, an image for *DKK-3* is shown. Inserts depict binding of the riboprobes to the ARC.

rhythmicity ( $P = .021$ ) with decreasing gene expression during the subjective day of the animal and increased gene expression during the subjective night. Consistently, *Cyclin-D1* reached peak values at ZT0 in LD and ZT18 in SD, whereas trough values were achieved at ZT18 in LD and ZT9 in SD.

*DKK-3* showed pronounced high-amplitude rhythmicity in LD ( $P < .001$ ) and elevating gene expression throughout the day with peak expression times shortly

after the end of the light phase at ZT18 and a trough after the dark phase. Contrarily, in SD, *DKK-3* levels were highest at ZT0 with declining gene expression during the day and elevating gene expression during the night, displaying a generally lower amplitude ( $P = .023$ ).

For *Axin-2*, *Cyclin-D1* and *DKK-3* we found that gene expression was regulated by photoperiod at individual time points. In LD a generally higher expression of *Axin-2* and *Cyclin-D1* was displayed relative to SD, with a trend toward higher *Axin-2* expression at ZT6 ( $P = .051$ ) and significantly elevated *Axin-2* expression at ZT9 and ZT12 (Figure 2A;  $P < .01$ ). *Cyclin-D1* expression in LD was elevated at ZT0, ZT3, ZT6, and ZT9 (Figure 2B;  $P < .05$ ) compared with SD. *DKK-3* showed a seasonally regulated gene expression with a declined expression at ZT3 (Figure 2C;  $P = .011$ ) and, conversely regulated, elevated expression at ZT6 ( $P = .011$ ) in LD relative to SD.

No diurnal rhythmicity was detected for *WNT-4*, *SFRP-2*, and *GSK-3 $\beta$*  (Figure 3, A–C). However, averaged expression throughout the diurnal cycle revealed that the non-rhythmic genes *WNT-4* and *SFRP-2* were down-regulated in the ARC of SD hamsters compared with LD hamsters by about 20% and 35%, respectively (Figure 3, A and B;  $P = .012$  and  $P = .005$ , respectively). In contrast, there was no effect of photoperiod on gene expression of the pathway-inactivating enzyme *GSK-3 $\beta$*  (Figure 3C;  $P = .745$ ).

### Effects of photoperiod and leptin on WNT coreceptor activation

After having established that several key components of the WNT pathway are differentially expressed during long and short photoperiod as well as throughout the day, we next tested whether activation of the WNT pathway at the level of the coreceptor might be dependent on photoperiod. Therefore, we performed immunohistochemistry to

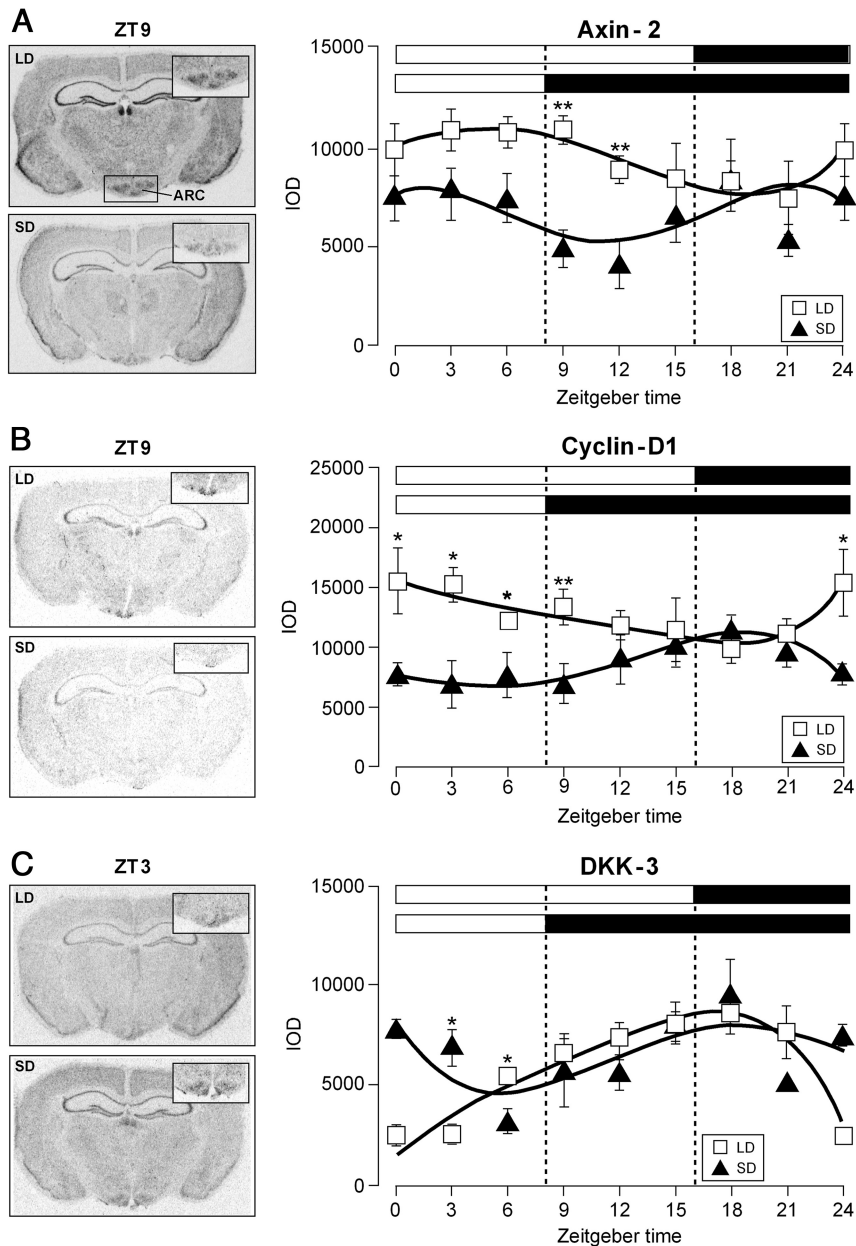

**Figure 2.** Temporal expression profiles of WNT signaling genes in the ARC of Djungarian hamsters acclimated to either LD (□) or SD (▲) photoperiod. *Axin-2* (A), *Cyclin-D1* (B), and *DKK-3* (C) were rhythmically expressed in both photoperiods. The left panels depict autoradiographs of representative coronal brain sections from time points when temporal gene expression was different between LD and SD; inserts in the left panels show binding of riboprobes to the ARC. The right panels show line charts of quantified signals in the ARC from three to four sections per animal. Open and solid bars at the top of each graph represent light and dark periods, respectively. Data are presented as means  $\pm$  SEM ( $n = 2-6$  at each time point). \*,  $P \leq .05$ , \*\*,  $P \leq .01$  reveal significantly different time points of gene expression between LD and SD. IOD, integrated OD.

detect phospho-LRP-6 (Ser1490)-immunoreactive cells in the ARC of hamsters in LD and SD that were furthermore challenged by ip leptin injections. Two-way ANOVA revealed a statistically significant effect of photoperiod ( $P < .001$ ) as well as leptin treatment ( $P = .011$ ) on WNT coreceptor activation; however, the effect of leptin was independent of which photoperiod was present ( $P = .837$ ;

hypothalamic brain regions such as the cortex, thalamus and hippocampus. The change in the mRNA expression of several WNT components (*WNT-4*, *Axin-2*, *Cyclin-D1*, *DKK-3*, and *SFRP-2*) during the differential photoperiods indicates that central WNT signaling may play an important role in the seasonal regulation of body weight and food intake in adult Djungarian hamsters. We have pre-

Figure 4). SD hamsters showed a significant decrease in the number of phospho-LRP-6 (Ser1490)-immunoreactive cells of about 40% compared with their littermates in LD. Interestingly, leptin-sensitive SD hamsters as well as LD hamsters, which are known to be leptin resistant (1, 26), revealed an increase in phospho-LRP-6 (Ser1490)-immunoreactive cells of about 45% and 30%, respectively, in response to ip leptin compared with hamsters that received vehicle.

## Discussion

The WNT pathway has been well characterized in embryogenesis and tumorigenesis. However, recent data suggested that this pathway has a much broader function in the central nervous system than was initially thought. Accumulating evidence suggests that it is involved in adult neurogenesis (7), the remodeling of the adult hypothalamus (8), and the neuroendocrine control of metabolism (5, 9). In the present study, we investigated the primary effects of the photoperiod on WNT signaling in the seasonal mammal *P. sungorus* to unravel its role in long-term seasonal changes in energy metabolism. Furthermore, we characterized whether mRNA expression is regulated in a diurnal manner.

We demonstrated that all investigated genes involved in the WNT pathway are expressed in the hypothalamic ARC, a key region in neuronal control of body weight and food intake. However, it is important to note that the expression of WNT genes also occurred in extra-

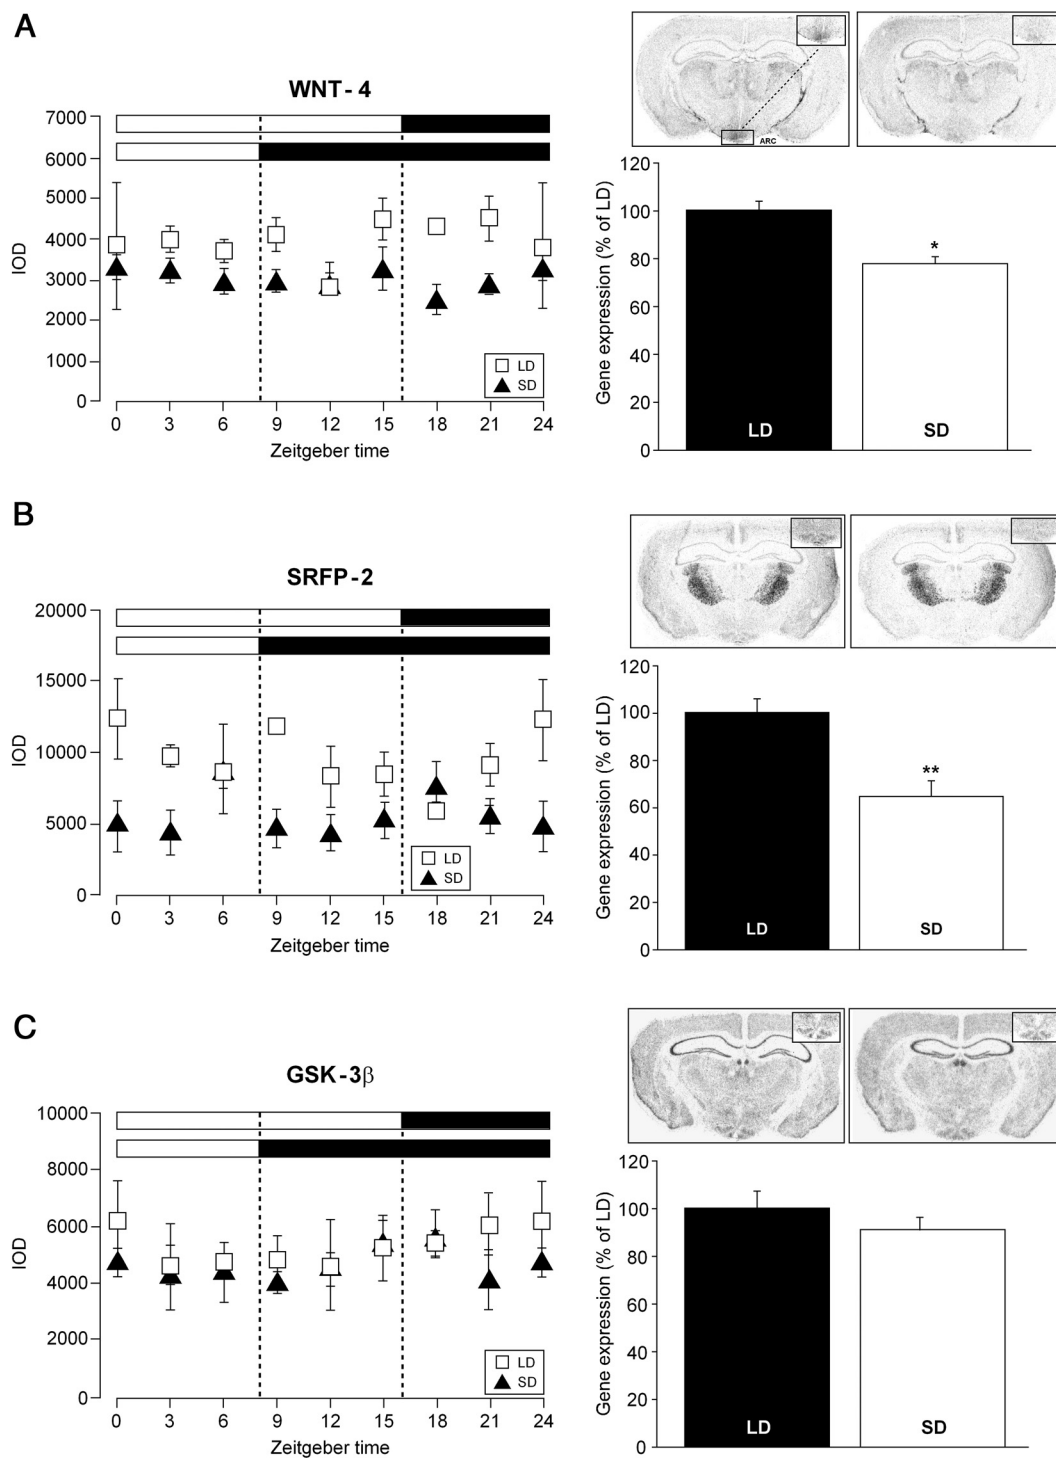

**Figure 3.** Temporal expression profiles of WNT genes of which no rhythmicity was detected over 24 hours. Averaged expression over 24 hours of *WNT-4* (A) and *SFRP-2* (B) was elevated in LD compared with SD, whereas *GSK-3β* gene expression (C) was not affected by the photoperiod. The left panels show line charts of quantified signals in the ARC from three to four sections per animal. The right panels show bar charts of averaged expression throughout the diurnal cycle with autoradiographs of representative coronal brain sections from LD and SD; inserts depict binding of riboprobes to the ARC. Data are presented as means  $\pm$  SEM. \*,  $P \leq .05$ , \*\*,  $P \leq .01$ . IOD, integrated OD.

viously demonstrated that WNT signaling is active in the adult murine brain (5). The expression of key members of the WNT pathway in several brain regions of two rodent species together with the finding that WNT genes are differentially expressed in response to changing photoperiod

in *P. sungorus* corroborates the importance of this pathway in the neuronal control of metabolism and its prominence in the adult brain.

We focused on WNT-4 and WNT-7a (27) as ligands for the WNT pathway because both have been shown to be

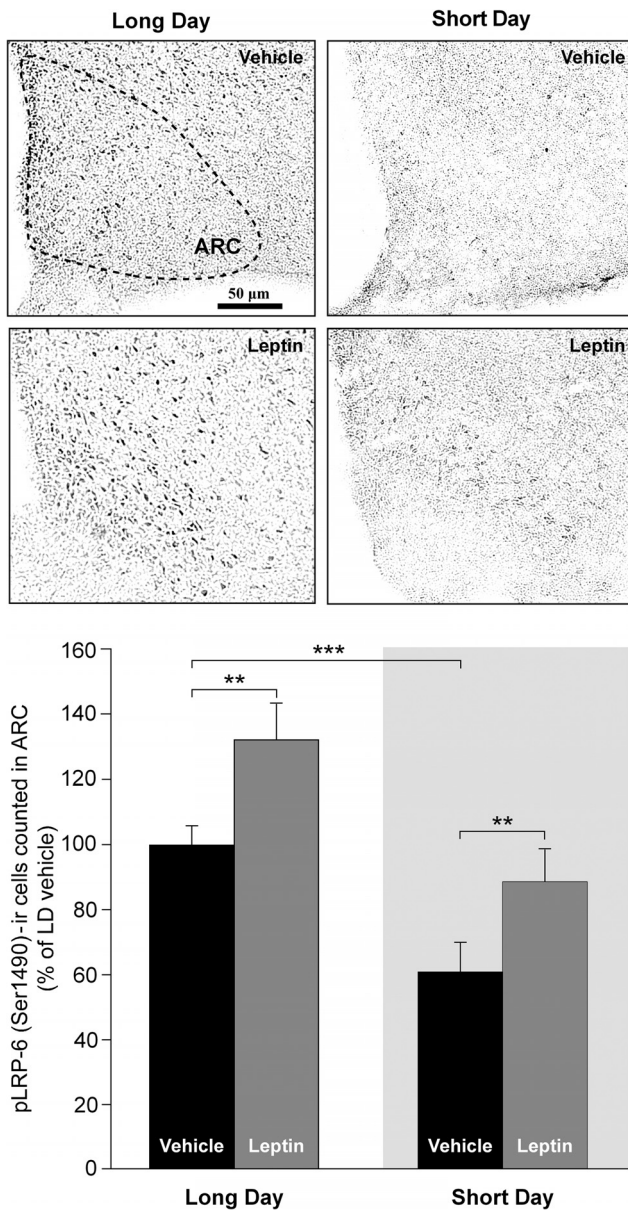

**Figure 4.** Photoperiod and leptin administration had a significant effect on WNT coreceptor activation. Immunoreactivity of phospho-LRP-6 (Ser1490) was increased in the ARC of LD compared with SD hamsters. Independent of photoperiod, leptin (2 mg/kg) administered ip led to a significant increase of phospho-LRP-6 (Ser1490)-immunoreactive cells in the ARC compared with vehicle. Upper panels depict representative coronal brain sections of each group, and lower panels show bar charts of quantified phospho-LRP-6-immunoreactive cells in the ARC from three sections per animal. Data are presented as the mean percentage values of LD control  $\pm$  SEM. \*\*,  $P \leq .01$ , \*\*\*,  $P \leq .001$ .

implicated in neural development, such as anterior-posterior guidance of commissural axon growth (28), maturation of synapses (29), neuronal differentiation (30), and central nervous system vascularization (31). Unfortunately, we could analyze gene expression data only for *WNT-4* because *WNT-7a* expression was below the detection limit of the very sensitive in situ hybridization using

radiolabeled probes. Gene expression of the ligand *WNT-4*, which activates the WNT pathway (32), was up-regulated in the ARC of LD relative to SD hamsters. This suggests an improved receptor activation of the WNT pathway in the ARC of LD-acclimated hamsters. Together with our finding that the WNT target genes *Axin-2* (33) and *Cyclin-D1* (34) were increased at certain time points throughout the diurnal rhythm in LD relative to SD, these data imply enhanced activation of the WNT signal transduction pathway in this photoperiod. Cyclin-D1 is a prominent mediator of mammalian cell growth (35, 36), and furthermore, WNT/ $\beta$ -catenin-mediated cyclin-D1 expression directly leads to enhanced cell proliferation (34). Thus, our data indicate increased neural cell proliferation in LD.

A crucial regulatory enzyme of WNT signaling is GSK-3 $\beta$  because ligands binding to WNT receptors lead to the inactivation of GSK-3 $\beta$  and thereby activation of the pathway. We did not find the regulation of GSK-3 $\beta$  by photoperiod on the level of gene expression. However, GSK-3 $\beta$  activity is regulated by posttranslational modification and the formation of an Axin-including degradation complex (37). Therefore, gene expression data of this particular member of the WNT pathway are not very informative, and we attempted to detect phosphorylated GSK-3 $\beta$ , which would allow us to determine the activity of this enzyme. Unfortunately, the readily available commercial antibodies to detect phospho-GSK-3 $\beta$  did not cross-react with hamster brain tissue.

*SFRP-2* mRNA was significantly up-regulated in the ARC of LD-acclimated hamsters compared with SD-acclimated hamsters. This is consistent with our previous study that showed that *SFRP-2* gene expression is increased in the hypothalamus of photoperiod-responsive F344 rats under LD relative to SD conditions (8). Some studies have shown that *SFRP-2* acts as an antagonist of the WNT pathway via interaction with WNT ligands to prevent them from binding to Fz receptors (38–40), and this appears contradictory to activated WNT signaling in LD. However, the WNT-antagonizing effect of *SFRP-2* has not been clearly established because, in contrast, Yoshino et al (41) demonstrated that *SFRP-2* inhibits other SFRPs to promote WNT activity. Interestingly, there is evidence that *WNT-4* does not only induce *SFRP-2* expression in particular tissues, but *SFRP-2* also binds *WNT-4* and enhances its signal transduction (39, 41). The mutual up-regulation of both genes in the ARC of LD hamsters might thereby have a synergistic effect, which might cause the up-regulation of the targets *Axin-2* and *Cyclin-D1* observed in this study.

In a previous study, we observed a marked photoperiodic response of *DKK-3* with elevated gene expression

during LD in F344 rats (8, 10). In the present study, *DKK-3* gene expression was profoundly coupled to the diurnal rhythm and regulated by photoperiod. Whether *DKK-3* was elevated or reduced in LD relative to SD was dependent on the time of day, suggesting that the diurnal control of this WNT-related gene overrides any photoperiodic regulation. In LD hamsters *DKK-3* gene expression was tightly coupled to the light/dark phase. It continuously increased throughout the light phase followed by a decrease during the dark phase. *DKK-3* is a member of the DKK family that inhibits WNT signaling by binding to the LRP-5/6 coreceptors (42). In line with the WNT inhibitory function of *DKK-3*, expression of the WNT target genes *Axin-2* and *Cyclin-D1* declined during the animals' subjective day and elevated during their subjective night in LD. The diurnal regulation of *DKK-3* on the one hand and reciprocal *Axin-2* and *Cyclin-D1* gene expression on the other hand implies that diurnal regulation of *DKK-3* in LD hamsters might have a yet-unknown physiological function to regulate WNT target genes in a circadian manner that is restricted to this photoperiod. Diurnal *DKK-3* gene expression in SD did not affect *Axin-2* and *Cyclin-D1* mRNA in the same manner as in LD. Surprisingly, the precise function of *DKK-3* in WNT signal transduction has not yet been established. Although some studies have shown that *DKK-3* has no influence on LRP-5/6 activation

or nuclear  $\beta$ -catenin accumulation (43, 44), others revealed effects on cytoplasmic  $\beta$ -catenin levels (45, 46). Moreover, an implication of *DKK-3* in noncanonical WNT/c-Jun N-terminal kinase signal transduction is being discussed (47, 48).

The diurnal rhythmicity of several WNT genes in the ARC might be suggestive for an interaction of the WNT pathway and the circadian clock. Although the master circadian clock resides in the suprachiasmatic nucleus, a food-entrainable oscillator has been proposed to be located in the ARC (49). In fact, WNT signal transduction was shown to be modulated by the clock gene brain and muscle Arnt-like 1 (*Bmal1*), with declined WNT signaling after attenuation of *Bmal1* function (50). Because *Bmal1* is known to be a prominent regulator of the genes that control metabolism (51), these data support the potential role of WNT signaling in the control of metabolic processes in the Djungarian hamster.

Initiation of the canonical WNT pathway requires activation of both the Fz receptor and the LRP-5/6 coreceptor. LRP-6 is activated by phosphorylation at Ser1490 (12), leading to the recruitment of Axin to the intracellular domain of the coreceptor (52–54) and subsequent inhibition of GSK-3 $\beta$ . The number of phospho-LRP-6 (Ser1490)-immunoreactive cells was enhanced in the ARC of LD hamsters compared with SD hamsters. Peripheral administration of the adipokine leptin induced an increase of phospho-LRP-6 (Ser1490) immunoreactivity in LD as well as in SD hamsters. This is consistent with our previous finding in obese leptin deficient *Lep<sup>ob/ob</sup>* mice, which exhibited increased phospho-LRP-6 (Ser1490) immunoreactivity and *Axin-2* and *Cyclin-D1* gene expression after leptin injection (5).

Notably, in the brain regions in which we detected WNT gene expression, the long form of the leptin receptor (*Lep<sup>Rb</sup>*) is also widely expressed in the Djungarian hamster and other rodent models (55–58). The coexistence of both leptin and WNT signaling in these brain regions indicates that the two pathways interact. By corroborating our findings from mice (5) in hamsters, we provide the first evidence of a novel, previously unknown central effect of leptin, ie, leptin is capable of activating the WNT coreceptor

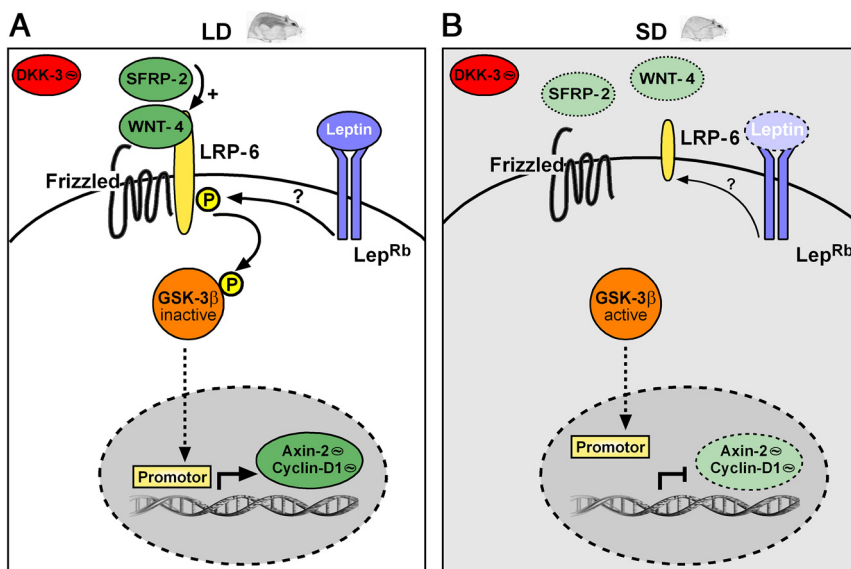

**Figure 5.** Model proposing the seasonal regulation of the WNT pathway in the hypothalamus of the Djungarian hamster. A, During LD, when leptin levels are elevated, phosphorylation of LRP-6 is increased, which might be mediated via synergistic action of up-regulated WNT-4 and SFRP-2 on the one hand and leptin on the other hand. LRP-6 is known to phosphorylate and thereby inactivate GSK-3 $\beta$ . This overrides the inhibitory effect of GSK-3 $\beta$  on WNT target gene expression and therefore increases *Axin-2* and *Cyclin-D1* mRNA. B, During SD, when leptin levels are low, reduced levels of WNT-4, SFRP-2, and leptin fail to activate LRP-6, leading to the enhanced activity of GSK-3 $\beta$ , which in turn would lead to reduced WNT target gene expression. The putative LRP-5/6 antagonist *DKK-3* is differentially regulated at individual time points in LD and SD, yet its role in WNT signaling is still unclear. Furthermore, the gene expression of *DKK-3* as well as the WNT target genes *Axin-2* and *Cyclin-D1* was under diurnal rhythmicity, indicated by  $\ominus$ .



LRP-6 across different species, revealing a potentially very important physiological regulation of the WNT pathway by leptin. This activation occurred at the level of the co-receptor LRP-6, which suggests that leptin activates the canonical WNT pathway. Future studies, however, are required to determine whether this hormone also affects noncanonical WNT signaling such as the planar cell polarity and  $\text{Ca}^{2+}$  pathways (59, 60).

Intriguingly, leptin enhanced LRP-6 activation in hamsters from both photoperiods. During the LD photoperiod, hamsters are resistant to exogenous leptin in terms of its catabolic effect (1) and also in terms of its ability to activate the signal transducer and activator of transcription 3 (STAT3) (61). The transcription factor STAT3 is part of the best-characterized Janus kinase 2-STAT3 leptin signaling pathway. Also, gene expression of the suppressor of cytokine signaling 3, which inhibits leptin signaling, was increased in LD compared with SD conditions (26, 62, 63). It is plausible that leptin activates the WNT pathway at the level of LRP-6 independent of Janus kinase 2-STAT3 signaling. Although leptin levels are elevated in LD compared with SD, in neither photoperiod circadian regulation of mean serum leptin levels was detected over a 24-hour profile in Djungarian hamsters (64, 65). This suggests that the diurnal regulation of WNT target genes and *DKK-3* might be independent of circulating leptin. It has been reported, however, that gene expression of *Lep<sup>Rb</sup>* is regulated in a circadian manner in the ARC of hamsters exposed to LD (64). This indicates that *Lep<sup>Rb</sup>* might be involved in circadian regulation of WNT signaling components. Circadian changes in *Lep<sup>Rb</sup>* expression were confined to LD hamsters (64), suggesting that leptin sensitivity is under the control of the circadian rhythm in LD, which counteracts to the perception that LD hamsters are generally leptin resistant relative to SD hamsters. The necessity to further assess the role of leptin sensitivity in seasonal body weight regulation is further supported by our finding that leptin activated LRP-6 in both photoperiods. Regulation of leptin sensitivity might be fine-tuned at different levels in the leptin receptor signaling cascade.

In LD hamsters, high circulating levels of leptin in combination with the synergistic effect of WNT-4 and SFRP-2 might potentiate the induction of phosphorylation of LRP-6, probably preventing the Axin-GSK-3 $\beta$  complexation and inhibiting GSK-3 $\beta$ . This would facilitate the expression of the WNT target genes such as *Axin-2* and *Cyclin-D1*. During SD, lower leptin levels in combination with reduced WNT-4 and SFRP-2 would explain the lower basal activation of LRP-6 relative to LD. Less activation of WNT signaling would attenuate the inhibition of GSK-3 $\beta$ , which as a negative WNT pathway regulator

would lead to the further reduction of WNT signaling and reduced target gene expression (Figure 5).

In conclusion, we provide strong evidence that WNT signaling is involved in the seasonal as well as the diurnal regulation of metabolism in the hypothalamus of the Djungarian hamster. The expression pattern of the investigated genes involved in WNT signaling and the post-translational modification of the WNT coreceptor strongly indicate that this pathway is functionally impaired in the hypothalamus of Djungarian hamsters during SD and reinstated during the LD photoperiod. Furthermore, these data corroborate our previous observation of leptin's ability to activate the WNT signal transduction in mice and imply a fundamental importance of WNT signaling in metabolic control (5).

## Acknowledgments

Address all correspondence and requests for reprints to: Alexander Tups, PhD, Department of Physiology, Otago School of Medical Sciences, University of Otago, PO Box 913, Dunedin, New Zealand. E-mail: alexander.tups@otago.ac.nz.

This work was supported by the German Ministry of Education and Research and by the German Research Foundation (to A.T.).

Disclosure Summary: The authors have nothing to disclose.

## References

1. Klingenspor M, Niggemann H, Heldmaier G. Modulation of leptin sensitivity by short photoperiod acclimation in the Djungarian hamster, *Phodopus sungorus*. *J Comp Physiol B*. 2000;170:37–43.
2. Moon RT, Brown JD, Torres M. WNTs modulate cell fate and behavior during vertebrate development. *Trends Genet*. 1997;13:157–162.
3. Peifer M, Polakis P. Wnt signaling in oncogenesis and embryogenesis—a look outside the nucleus. *Science*. 2000;287:1606–1609.
4. Ohba S, Lanigan TM, Roessler BJ. Leptin receptor JAK2/STAT3 signaling modulates expression of Frizzled receptors in articular chondrocytes. *Osteoarthritis Cartilage*. 2010;18:1620–1629.
5. Benzler J, Andrews ZB, Pracht C, et al. Hypothalamic WNT signalling is impaired during obesity and reinstated by leptin treatment in male mice. *Endocrinology*. 2013;154:4737–4745.
6. Ross SE, Hemati N, Longo KA, et al. Inhibition of adipogenesis by Wnt signaling. *Science*. 2000;289:950–953.
7. Inestrosa NC, Arenas E. Emerging roles of Wnts in the adult nervous system. *Nat Rev Neurosci*. 2010;11:77–86.
8. Helfer G, Ross AW, Russell L, et al. Photoperiod regulates vitamin A and Wnt/ $\beta$ -catenin signaling in F344 rats. *Endocrinology*. 2012;153:815–824.
9. Benzler J, Ganjam GK, Kruger M, et al. Hypothalamic glycogen synthase kinase 3 $\beta$  has a central role in the regulation of food intake and glucose metabolism. *Biochem J*. 2012;447:175–184.
10. Helfer G, Ross AW, Morgan PJ. Neuromedin U partly mimics thyroid-stimulating hormone and triggers Wnt/ $\beta$ -catenin signalling in the photoperiodic response of F344 rats. *J Neuroendocrinol*. 2013;25:1264–1272.

11. Ross AW, Helfer G, Russell L, Darras VM, Morgan PJ. Thyroid hormone signalling genes are regulated by photoperiod in the hypothalamus of F344 rats. *PLoS One*. 2011;6:e21351.
12. Tamai K, Semenov M, Kato Y, et al. LDL-receptor-related proteins in Wnt signal transduction. *Nature*. 2000;407:530–535.
13. MacDonald BT, Tamai K, He X. Wnt/ $\beta$ -catenin signaling: components, mechanisms, and diseases. *Dev Cell*. 2009;17:9–26.
14. Reppert SM, Weaver DR. Coordination of circadian timing in mammals. *Nature*. 2002;418:935–941.
15. Asher G, Schibler U. Crosstalk between components of circadian and metabolic cycles in mammals. *Cell Metab*. 2011;13:125–137.
16. Lamia KA, Sachdeva UM, DiTacchio L, et al. AMPK regulates the circadian clock by cryptochrome phosphorylation and degradation. *Science*. 2009;326:437–440.
17. Harada Y, Sakai M, Kurabayashi N, Hirota T, Fukada Y. Ser-557-phosphorylated mCRY2 is degraded upon synergistic phosphorylation by glycogen synthase kinase-3 $\beta$ . *J Biol Chem*. 2005;280:31714–31721.
18. Yin L, Wang J, Klein PS, Lazar MA. Nuclear receptor Rev-erb $\alpha$  is a critical lithium-sensitive component of the circadian clock. *Science*. 2006;311:1002–1005.
19. Spengler ML, Kuropatwinski KK, Schumer M, Antoch MP. A serine cluster mediates BMAL1-dependent CLOCK phosphorylation and degradation. *Cell Cycle*. 2009;8:4138–4146.
20. Sahar S, Zocchi L, Kinoshita C, Borrelli E, Sassone-Corsi P. Regulation of BMAL1 protein stability and circadian function by GSK3 $\beta$ -mediated phosphorylation. *PLoS One*. 2010;5:e8561.
21. Ko HW, Kim EY, Chiu J, Vanselow JT, Kramer A, Edey I. A hierarchical phosphorylation cascade that regulates the timing of PERIOD nuclear entry reveals novel roles for proline-directed kinases and GSK-3 $\beta$ /SGG in circadian clocks. *J Neurosci*. 2010;30:12664–12675.
22. Fu L, Pelicano H, Liu J, Huang P, Lee C. The circadian gene *Period2* plays an important role in tumor suppression and DNA damage response in vivo. *Cell*. 2002;111:41–50.
23. Tups A, Anderson GM, Rizwan M, et al. Both p110 $\alpha$  and p110 $\beta$  isoforms of phosphatidylinositol 3-OH-kinase are required for insulin signalling in the hypothalamus. *J Neuroendocrinol*. 2010;22:534–542.
24. Mercer JG, Lawrence CB, Beck B, Burlet A, Atkinson T, Barrett P. Hypothalamic NPY and prepro-NPY mRNA in Djungarian hamsters: effects of food deprivation and photoperiod. *Am J Physiol*. 1995;269:R1099–R1106.
25. Paxinos G, Franklin KBJ, Franklin KBJ. *The Mouse Brain in Stereotaxic Coordinates*. 2nd ed. San Diego: Academic Press; 2001.
26. Tups A, Ellis C, Moar KM, et al. Photoperiodic regulation of leptin sensitivity in the Siberian hamster, *Phodopus sungorus*, is reflected in arcuate nucleus SOCS-3 (suppressor of cytokine signaling) gene expression. *Endocrinology*. 2004;145:1185–1193.
27. Cerpa W, Godoy JA, Alfaro I, et al. Wnt-7a modulates the synaptic vesicle cycle and synaptic transmission in hippocampal neurons. *J Biol Chem*. 2008;283:5918–5927.
28. Lyuksyutova AI, Lu CC, Milanesio N, et al. Anterior-posterior guidance of commissural axons by Wnt-frizzled signaling. *Science*. 2003;302:1984–1988.
29. Hall AC, Lucas FR, Salinas PC. Axonal remodeling and synaptic differentiation in the cerebellum is regulated by WNT-7a signaling. *Cell*. 2000;100:525–535.
30. Hirabayashi Y, Itoh Y, Tabata H, et al. The Wnt/ $\beta$ -catenin pathway directs neuronal differentiation of cortical neural precursor cells. *Development*. 2004;131:2791–2801.
31. Stenman JM, Rajagopal J, Carroll TJ, Ishibashi M, McMahon J, McMahon AP. Canonical Wnt signaling regulates organ-specific assembly and differentiation of CNS vasculature. *Science*. 2008;322:1247–1250.
32. Lyons JP, Mueller UW, Ji H, et al. Wnt-4 activates the canonical  $\beta$ -catenin-mediated Wnt pathway and binds Frizzled-6 CRD: functional implications of Wnt/ $\beta$ -catenin activity in kidney epithelial cells. *Exp Cell Res*. 2004;298:369–387.
33. Jho EH, Zhang T, Domon C, Joo CK, Freund JN, Costantini F. Wnt/ $\beta$ -catenin/Tcf signaling induces the transcription of Axin2, a negative regulator of the signaling pathway. *Mol Cell Biol*. 2002;22:1172–1183.
34. Tetsu O, McCormick F.  $\beta$ -Catenin regulates expression of cyclin D1 in colon carcinoma cells. *Nature*. 1999;398:422–426.
35. Quelle DE, Ashmun RA, Shurtleff SA, et al. Overexpression of mouse D-type cyclins accelerates G1 phase in rodent fibroblasts. *Genes Dev*. 1993;7:1559–1571.
36. Lahti JM, Li H, Kidd VJ. Elimination of cyclin D1 in vertebrate cells leads to an altered cell cycle phenotype, which is rescued by overexpression of murine cyclins D1, D2, or D3 but not by a mutant cyclin D1. *J Biol Chem*. 1997;272:10859–10869.
37. Ding VW, Chen RH, McCormick F. Differential regulation of glycogen synthase kinase 3 $\beta$  by insulin and Wnt signaling. *J Biol Chem*. 2000;275:32475–32481.
38. Rattner A, Hsieh JC, Smallwood PM, et al. A family of secreted proteins contains homology to the cysteine-rich ligand-binding domain of frizzled receptors. *Proc Natl Acad Sci USA*. 1997;94:2859–2863.
39. Lescher B, Haenig B, Kispert A. sFRP-2 is a target of the Wnt-4 signaling pathway in the developing metanephric kidney. *Dev Dyn*. 1998;213:440–451.
40. Ladher RK, Church VL, Allen S, et al. Cloning and expression of the Wnt antagonists Sfrp-2 and Frzb during chick development. *Dev Biol*. 2000;218:183–198.
41. Yoshino K, Rubin JS, Higinbotham KG, et al. Secreted Frizzled-related proteins can regulate metanephric development. *Mech Dev*. 2001;102:45–55.
42. Krupnik VE, Sharp JD, Jiang C, et al. Functional and structural diversity of the human Dickkopf gene family. *Gene*. 1999;238:301–313.
43. Mao B, Wu W, Li Y, et al. LDL-receptor-related protein 6 is a receptor for Dickkopf proteins. *Nature*. 2001;411:321–325.
44. Tsuji T, Miyazaki M, Sakaguchi M, Inoue Y, Namba M. A REIC gene shows down-regulation in human immortalized cells and human tumor-derived cell lines. *Biochem Biophys Res Commun*. 2000;268:20–24.
45. Caricasole A, Ferraro T, Iacovelli L, et al. Functional characterization of WNT7A signaling in PC12 cells: interaction with a FZD5  $\times$  LRP6 receptor complex and modulation by Dickkopf proteins. *J Biol Chem*. 2003;278:37024–37031.
46. Hoang BH, Kubo T, Healey JH, et al. Dickkopf 3 inhibits invasion and motility of Saos-2 osteosarcoma cells by modulating the Wnt- $\beta$ -catenin pathway. *Cancer Res*. 2004;64:2734–2739.
47. Abarzua F, Sakaguchi M, Takaishi M, et al. Adenovirus-mediated overexpression of REIC/Dkk-3 selectively induces apoptosis in human prostate cancer cells through activation of c-Jun-NH2-kinase. *Cancer Res*. 2005;65:9617–9622.
48. Ueno K, Hirata H, Majid S, et al. Wnt antagonist DICKKOPF-3 (Dkk-3) induces apoptosis in human renal cell carcinoma. *Mol Carcinog*. 2011;50:449–457.
49. Tan K, Knight ZA, Friedman JM. Ablation of AgRP neurons impairs adaptation to restricted feeding. *Mol Metab*. 2014;3:694–704.
50. Guo B, Chatterjee S, Li L, et al. The clock gene, brain and muscle Arnt-like 1, regulates adipogenesis via Wnt signaling pathway. *FASEB J*. 2012;26:3453–3463.
51. Hatanaka F, Matsubara C, Myung J, et al. Genome-wide profiling of the core clock protein BMAL1 targets reveals a strict relationship with metabolism. *Mol Cell Biol*. 2010;30:5636–5648.
52. Mao J, Wang J, Liu B, et al. Low-density lipoprotein receptor-related protein-5 binds to Axin and regulates the canonical Wnt signaling pathway. *Mol Cell*. 2001;7:801–809.
53. Tolwinski NS, Wehrli M, Rives A, Erdeniz N, DiNardo S, Wieschaus E. Wg/Wnt signal can be transmitted through arrow/

- LRP5,6 and Axin independently of Zw3/Gsk3 $\beta$  activity. *Dev Cell*. 2003;4:407–418.
54. Tamai K, Zeng X, Liu C, et al. A mechanism for Wnt coreceptor activation. *Mol Cell*. 2004;13:149–156.
55. Mercer JG, Moar KM, Ross AW, Hoggard N, Morgan PJ. Photoperiod regulates arcuate nucleus POMC, AGRP, and leptin receptor mRNA in Siberian hamster hypothalamus. *Am J Physiol Regul Integr Comp Physiol*. 2000;278:R271–R281.
56. Mercer JG, Hoggard N, Williams LM, Lawrence CB, Hannah LT, Trayhurn P. Localization of leptin receptor mRNA and the long form splice variant (Ob-Rb) in mouse hypothalamus and adjacent brain regions by in situ hybridization. *FEBS Lett*. 1996;387:113–116.
57. Hakansson ML, Brown H, Ghilardi N, Skoda RC, Meister B. Leptin receptor immunoreactivity in chemically defined target neurons of the hypothalamus. *J Neurosci*. 1998;18:559–572.
58. Shioda S, Funahashi H, Nakajo S, Yada T, Maruta O, Nakai Y. Immunohistochemical localization of leptin receptor in the rat brain. *Neurosci Lett*. 1998;243:41–44.
59. Boutros M, Paricio N, Strutt DI, Mlodzik M. Dishevelled activates JNK and discriminates between JNK pathways in planar polarity and wingless signaling. *Cell*. 1998;94:109–118.
60. Slusarski DC, Corces VG, Moon RT. Interaction of Wnt and a Frizzled homologue triggers G-protein-linked phosphatidylinositol signalling. *Nature*. 1997;390:410–413.
61. Tups A, Stohr S, Helwig M, et al. Seasonal leptin resistance is associated with impaired signalling via JAK2-STAT3 but not ERK, possibly mediated by reduced hypothalamic GRB2 protein. *J Comp Physiol B*. 2012;182:553–567.
62. Bjorbaek C, Elmquist JK, Frantz JD, Shoelson SE, Flier JS. Identification of SOCS-3 as a potential mediator of central leptin resistance. *Mol Cell*. 1998;1:619–625.
63. Tups A, Barrett P, Ross AW, Morgan PJ, Klingenspor M, Mercer JG. The suppressor of cytokine signalling 3, SOCS3, may be one critical modulator of seasonal body weight changes in the Siberian hamster, *Phodopus sungorus*. *J Neuroendocrinol*. 2006;18:139–145.
64. Ellis C, Moar KM, Logie TJ, Ross AW, Morgan PJ, Mercer JG. Diurnal profiles of hypothalamic energy balance gene expression with photoperiod manipulation in the Siberian hamster, *Phodopus sungorus*. *Am J Physiol Regul Integr Comp Physiol*. 2008;294:R1148–R1153.
65. Horton TH, Buxton OM, Losee-Olson S, Turek FW. Twenty-four-hour profiles of serum leptin in Siberian and golden hamsters: photoperiodic and diurnal variations. *Horm Behav*. 2000;37:388–398.
